# Supplementary material for: Human Skin Bacterial Community Response to Probiotic (Lactobacillus reuteri DSM 17938) Introduction
Source: MDPI journal article supplement (doi:10.3390/microorganisms8081223), 2020-08-11
Supplement: s1 [file s1]

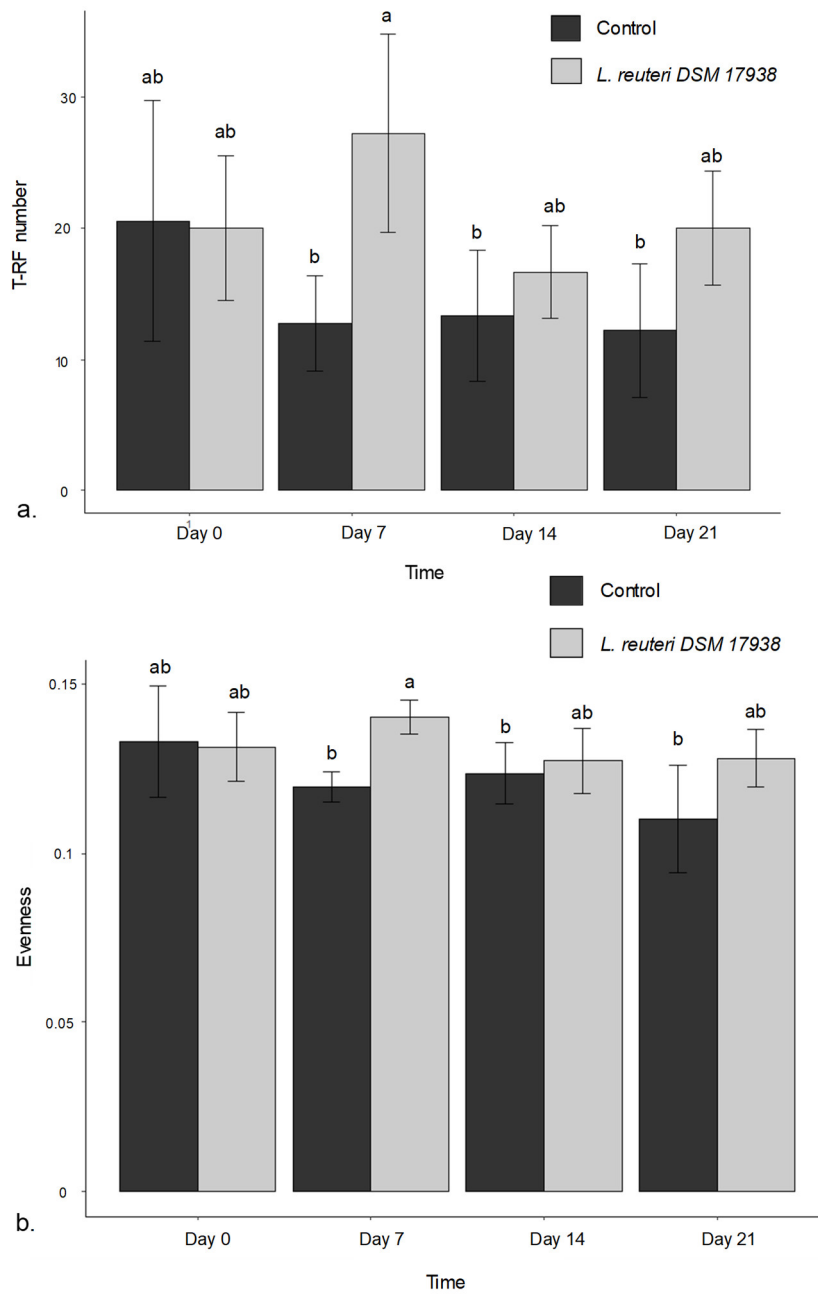

**Figure S1.** Number of T-RFs (**a**) and restriction profile evenness (**b**) of the skin bacterial communities without (control) and with the application of *L. reuteri* DSM 17938 during the experiment, for all subjects. Error bars represent the standard deviation of the mean ( $n = 9$ ).
